# Supplementary material
Source: MDPI journal article supplement (https://www.mdpi.com/2073-4441/12/11/3272)
Supplement: s1 [file s1]

Supplementary Material

# The Impacts of Climate Change on Wastewater Treatment Costs: Evidence from the Wastewater Sector in China

Ami Reznik<sup>1\*</sup> Yu Jiang<sup>2</sup> and Ariel Dinar<sup>1</sup>

<sup>1</sup> School of Public Policy, University of California, Riverside, 900 University Ave. Riverside, CA 92521, USA

<sup>2</sup> Environmental Economics and Natural Resources Group, Wageningen University & Research, P.O. Box 9101, 6700 HB Wageningen, The Netherlands

\* Correspondence: ami.reznik@mail.huji.ac.il

Received: 27 October 2020; Accepted 19 November 2020; date; Published: date

**Table S1.** Simulated future climate change impacts on wastewater treatment costs under 1.4% interest rate assumption.

| Variables | Annual O&M Costs (Million \$) |        |        |                                    |      |      | Per Unit of Wastewater Treated O&M Cost (\$/m <sup>3</sup> ) |      |      |
|-----------|-------------------------------|--------|--------|------------------------------------|------|------|--------------------------------------------------------------|------|------|
|           | Entire Sample ( $\theta^S$ )  |        |        | Average Plant ( $\bar{\theta}^P$ ) |      |      | Average Plant ( $\bar{\mu}^P$ )                              |      |      |
|           | R1                            | R2     | R3     | R1                                 | R2   | R3   | R1                                                           | R2   | R3   |
| Base      |                               | 302.03 |        |                                    | 1.85 |      |                                                              | 0.11 |      |
| G1        | 722.65                        | 767.44 | 762.21 | 4.43                               | 4.71 | 4.68 | 0.33                                                         | 0.35 | 0.35 |
| G2        | 616.73                        | 653.10 | 693.07 | 3.78                               | 4.01 | 4.25 | 0.29                                                         | 0.31 | 0.34 |
| G3        | 173.67                        | 179.42 | 164.79 | 1.07                               | 1.10 | 1.01 | 0.07                                                         | 0.07 | 0.06 |
| G4        | 764.91                        | 767.01 | 773.14 | 4.69                               | 4.71 | 4.74 | 0.29                                                         | 0.29 | 0.29 |
| G5        | 695.91                        | 714.54 | 698.29 | 4.27                               | 4.38 | 4.28 | 0.31                                                         | 0.32 | 0.30 |
| G6        | 727.87                        | 743.22 | 714.41 | 4.47                               | 4.56 | 4.38 | 0.31                                                         | 0.32 | 0.30 |
| G7        | 382.70                        | 400.18 | 416.91 | 2.35                               | 2.46 | 2.56 | 0.16                                                         | 0.16 | 0.17 |

**Table S2.** Simulated future climate change impacts on wastewater treatment costs under 5.5% interest rate assumption.

| Variables | Annual O&M Costs (Million \$) |        |        |                                    |      |      | Per Unit of Wastewater Treated O&M Cost (\$/m <sup>3</sup> ) |      |      |
|-----------|-------------------------------|--------|--------|------------------------------------|------|------|--------------------------------------------------------------|------|------|
|           | Entire Sample ( $\theta^S$ )  |        |        | Average Plant ( $\bar{\theta}^P$ ) |      |      | Average Plant ( $\bar{\mu}^P$ )                              |      |      |
|           | R1                            | R2     | R3     | R1                                 | R2   | R3   | R1                                                           | R2   | R3   |
| Base      |                               | 302.03 |        |                                    | 1.85 |      |                                                              | 0.11 |      |
| G1        | 121.43                        | 135.88 | 122.71 | 0.74                               | 0.83 | 0.75 | 0.05                                                         | 0.06 | 0.05 |
| G2        | 104.73                        | 111.94 | 109.22 | 0.64                               | 0.69 | 0.67 | 0.04                                                         | 0.05 | 0.05 |
| G3        | 30.71                         | 30.86  | 28.11  | 0.19                               | 0.19 | 0.17 | 0.01                                                         | 0.01 | 0.01 |
| G4        | 128.61                        | 129.91 | 129.47 | 0.79                               | 0.80 | 0.79 | 0.04                                                         | 0.05 | 0.05 |
| G5        | 114.20                        | 118.29 | 115.52 | 0.70                               | 0.73 | 0.71 | 0.05                                                         | 0.05 | 0.05 |
| G6        | 124.08                        | 125.70 | 121.92 | 0.76                               | 0.77 | 0.75 | 0.05                                                         | 0.05 | 0.05 |
| G7        | 65.99                         | 70.01  | 73.54  | 0.40                               | 0.43 | 0.45 | 0.02                                                         | 0.03 | 0.03 |

**Table S3.** List of symbols used in the manuscript.

| <b>Symbol</b>            | <b>Remarks</b>                                                                                                                                             |
|--------------------------|------------------------------------------------------------------------------------------------------------------------------------------------------------|
| $k$                      | Set of treatment plant characteristics                                                                                                                     |
| $m$                      | Set of continuous treatment plant parameters                                                                                                               |
| $i$                      | Set of treatment plants                                                                                                                                    |
| $t$                      | Time periods                                                                                                                                               |
| $g$                      | Climate prediction models                                                                                                                                  |
| $r$                      | Greenhouse gas emission scenarios                                                                                                                          |
| $p$                      | Policy design scenarios                                                                                                                                    |
| $v$                      | Wastewater volume scenarios                                                                                                                                |
| $s$                      | Simulations                                                                                                                                                |
| <b>T</b>                 | Vector of treatment technology dummy variables                                                                                                             |
| <b>P</b>                 | Vector of provincial dummy variables                                                                                                                       |
| <b>D</b>                 | Vector of decadal dummy variables                                                                                                                          |
| $I$                      | Investment level in wastewater treatment plants                                                                                                            |
| $V$                      | Volume treated in wastewater treatment plants                                                                                                              |
| $C$                      | Designed capacity of wastewater treatment plants                                                                                                           |
| $Y$                      | Year wastewater treatment plant established                                                                                                                |
| <b>Q</b>                 | Vector of wastewater inflow and outflow quality parameters                                                                                                 |
| <b>W</b>                 | Vector of climate indicators                                                                                                                               |
| $TVC$                    | Sample year observed total variable costs of wastewater treatment plants                                                                                   |
| $\alpha$                 | Coefficients of estimated wastewater treatment cost function                                                                                               |
| $\beta$                  | Coefficients of estimated wastewater treatment cost function                                                                                               |
| <b>Z</b>                 | Set of explanatory dummy variables                                                                                                                         |
| <b>X</b>                 | Set of explanatory continuous variables                                                                                                                    |
| $z_k$                    | Variable included in the set of dummy explanatories                                                                                                        |
| $x_m$                    | Variable included in the set of continuous explanatories                                                                                                   |
| $Z_t^s$                  | Set of explanatory dummy variables for specific simulation in future time-period                                                                           |
| $X_{rgpvt}^s$            | Set of explanatory continuous variables for specific simulation in future time-period for a combination of policy, climate and wastewater volume scenarios |
| $\Omega^s$               | Set of estimated coefficients of the wastewater treatment cost function for a specific simulation                                                          |
| $\beta_I$                | Cost function coefficient estimate of investment level                                                                                                     |
| $\beta_C$                | Cost function coefficient estimate of designed capacity                                                                                                    |
| $\beta_V$                | Cost function coefficient estimate of treated volume                                                                                                       |
| $\beta_Y$                | Cost function coefficient estimate of tenure                                                                                                               |
| $\beta_{Q_{In}}$         | Cost function coefficient estimate of influent BOD level                                                                                                   |
| $\beta_{Q_{Out}}$        | Cost function coefficient estimate of effluent BOD level                                                                                                   |
| $\beta_{tmp_{av}}^{pst}$ | Cost function coefficient estimate of past annual average temperature                                                                                      |

Table S3. Continued.

| Symbol                    | Remarks                                                                                                        |
|---------------------------|----------------------------------------------------------------------------------------------------------------|
| $\beta_{tmp_{var}}^{pst}$ | Cost function coefficient estimate of past intra-annual variance in temperature                                |
| $\beta_{tmp_{av}}^{rat}$  | Cost function coefficient estimate of the ratio between observed and past annual average temperature           |
| $\beta_{tmp_{var}}^{rat}$ | Cost function coefficient estimate of the ratio between observed and past intra-annual variance in temperature |
| $\mu_i^P$                 | Plant level average per volume treated predicted wastewater treatment cost                                     |
| $\theta^S$                | Total costs of wastewater treatment over the entire sample                                                     |
| $\bar{\mu}^P$             | Sample average of per volume treated predicted wastewater treatment cost                                       |
| $\bar{\theta}^P$          | Sample average of plant level predicted wastewater treatment cost                                              |
| $\mu_{min}^P$             | Sample minimum of per volume treated predicted wastewater treatment cost                                       |
| $\theta_{min}^P$          | Sample minimum of plant level predicted wastewater treatment cost                                              |
| $\mu_{max}^P$             | Sample maximum of per volume treated predicted wastewater treatment cost                                       |
| $\theta_{max}^P$          | Sample maximum of plant level predicted wastewater treatment cost                                              |
